# Supplementary material for: Constructing flexible cellulose–Cu nanocomposite film through in situ coating with highly single-side conductive performance
Source: Royal Society of Chemistry journal article supplement (doi:10.1039/c3tc31865f), 2013-10-23
Supplement: c3tc31865f.pdf [file c3tc31865f.pdf]

## Electronic Supplementary Information

### **Constructing flexible cellulose-Cu nanocomposite film through *in situ* coating with highly single-side conductive performance**

Baoquan Jia, Yue Dong, Jinping Zhou\* and Lina Zhang

*Department of Chemistry, Wuhan University, Wuhan 430072, China*

---

\* Corresponding author. Tel.: +86 27 87219274. Fax: +86 27 68754067.

E-mail address: [zhoujp325@whu.edu.cn](mailto:zhoujp325@whu.edu.cn) (J. Zhou)

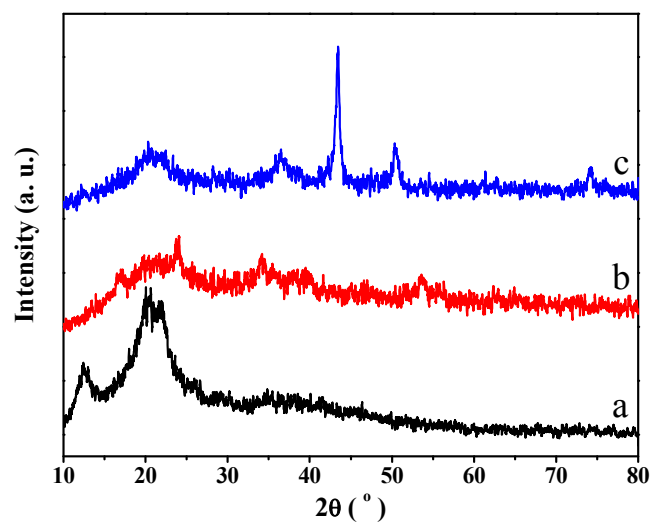

**Fig. S1** XRD patterns of the (a) regenerated cellulose (RC) film, (b) coagulated film and (c) RC-Cu nanocomposite film. The films were cut into powder before measurement.

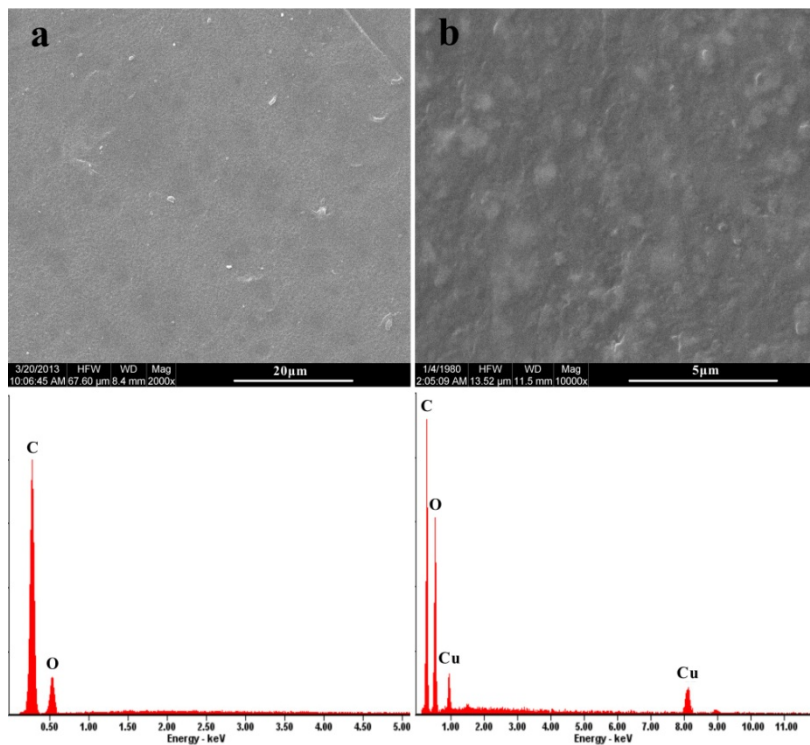

**Fig. S2** SEM images and EDS spectra of the front surface of the (a) RC and (b) coagulated films.

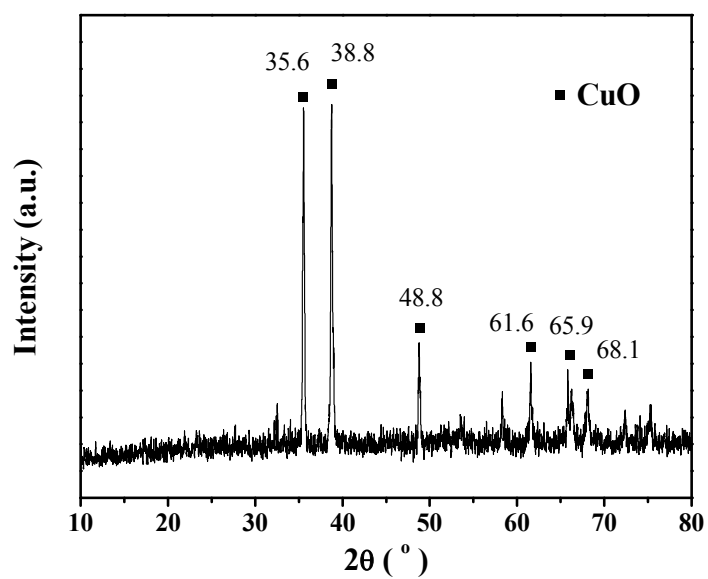

**Fig. S3** XRD pattern of the CuO powder (JCPDS file no. 48-1548) of RC-Cu nanocomposite film calcined at 600 °C for 3 h.

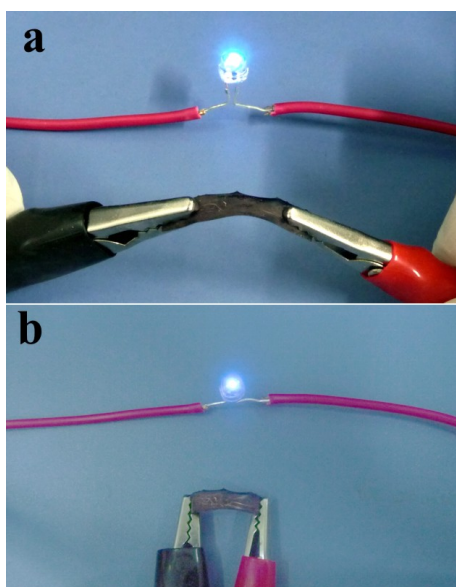

**Fig. S4** Conductivity of the RC-Cu nanocomposite film at different degrees of bending.

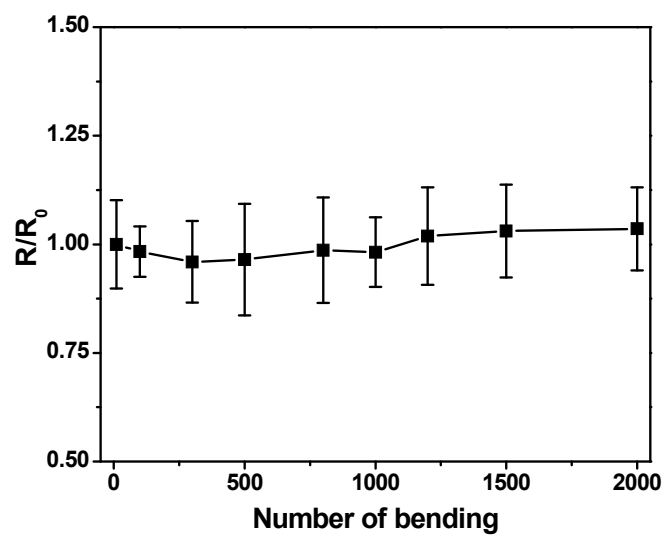

**Fig. S5** Resistance ratio of the RC-Cu nanocomposite film versus number of bending measured by multimeter.
